# Supplementary material for: Screening of ester-forming and hydrolyzing enzymes linked to pheromone production in Ips typographus (Linnaeus, 1758)
Source: BMC Genomics. 2026 Mar 24;27:431. doi: 10.1186/s12864-026-12773-0 (PMC13134222; doi:10.1186/s12864-026-12773-0)
Supplement: Supplementary file 2 — Supplementary Material 2. [file 12864_2026_12773_MOESM2_ESM.xlsx]

## Sheet: Sheet1
Supplementary Table S2
Mapping of abbreviated esterase names to full transcript identifiers from the de novo transcriptome.
I. typographus Esterase Candidate	Genomic coordonates in CZU_Ityp_1.0 (GCA_016097725.1)	Contig identificator in draft transcriptome assembly	Predicted protein	GenBank accession number
Ityp-CE1-2	JADDUH010000016.1:120330..123160(-)	NODE_64602	α/β hydrolase, carboxylic ester-type	PX172094
Ityp-CE1-2	JADDUH010000023.1:1945383..1948136(-)	NODE_64602	α/β hydrolase, carboxylic ester-type	PX172104
Ityp-CE3	JADDUH010000016.1:437780..440465(+)	NODE_58469	α/β hydrolase, carboxylic ester-type	PX172095
Ityp-CE4	JADDUH010000023.1:1631175..1635450(+)	NODE_48610	α/β hydrolase, carboxylic ester-type	PX172103
Ityp-CE5	JADDUH010000101.1:84761..87111(-)	NODE_34783	α/β hydrolase, carboxylic ester-type	PX172105
Ityp-CE6	JADDUH010000101.1:87392..89937(+)	NODE_105987	α/β hydrolase, carboxylic ester-type	PX172106
Ityp-CE7	JADDUH010000005.1:5156628..5159010(+)	NODE_67311	α/β hydrolase, carboxylic ester-type	PX172087
Ityp-CE8	JADDUH010000005.1:2515045..2517562(-)	NODE_61225, NODE_80371	α/β hydrolase, carboxylic ester-type	PX172089
Ityp-CE9	JADDUH010000003.1:8583923..8586174(+)	NODE_58466	α/β hydrolase, carboxylic ester-type	PX172091
Ityp-CE10	JADDUH010000030.1:199862..211416(+)	NODE_8625	α/β hydrolase, carboxylic ester-type	PX172098
Ityp-CE11	JADDUH010000004.1:12791365..12822626(+)	NODE_51365	α/β hydrolase, carboxylic ester-type	PX172108
Ityp-CE12	JADDUH010000003.1:5494165..5500975(-)	NODE_10014	α/β hydrolase, carboxylic ester-type	PX172092
Ityp-CE13	JADDUH010000003.1:5500810..5505502(-)	NODE_65864	α/β hydrolase, carboxylic ester-type	PX172093
Ityp-CE14	JADDUH010000016.1:992577..995497(-)	NODE_63920	α/β hydrolase, carboxylic ester-type	PX172096
Ityp-CE15	JADDUH010000016.1:997197..1000390(+)	NODE_62638	α/β hydrolase, carboxylic ester-type	PX172097
Ityp-CE16	JADDUH010000011.1:5145841..5148139(+)	NODE_53856	α/β hydrolase, carboxylic ester-type	PX172110
Ityp-CE17	JADDUH010000001.1:12747429..12750791(+)	NODE_31809	α/β hydrolase, carboxylic ester-type	PX172111
Ityp-CE18	JADDUH010000001.1:12743770..12746301(+)	NODE_29824	α/β hydrolase, carboxylic ester-type	PX172112
Ityp-CE19	JADDUH010000010.1:5620923..5624384(+)	NODE_127594	α/β hydrolase, carboxylic ester-type	PX172102
Ityp-CE20	JADDUH010000003.1:2705268..2710298(+)	NODE_94092	α/β hydrolase, JH-type	PX172090
Ityp-CE21	JADDUH010000028.1:754390..767193(-)	NODE_109299	α/β hydrolase, carboxylic ester-type	PX172107
Ityp-CE22	JADDUH010000006.1:5483285..5486626(+)	NODE_65297	α/β hydrolase, carboxylic ester-type	PX172101
Ityp-CE23	JADDUH010000006.1:1356741..1362265(-)	NODE_66053-A	α/β hydrolase, carboxylic ester-type	PX172099
Ityp-CE24	JADDUH010000006.1:1362405..1367270(+)	NODE_66053-B	α/β hydrolase, carboxylic ester-type	PX172100
Ityp-altCEA	JADDUH010000007.1:1358619..1376917(+)	NODE_50906	Diacylglycerol acyltransferase/wax synthase	PX172109
Ityp-altCEB	JADDUH010000005.1:5600454..5609833(+)	NODE_10100	α/β hydrolase, neurotactin-like	PX172088
Ityp-LIP1	JADDUH010000017.1:329070..342435(-)	NODE_95259	Esterase (lipase-like)	PX172114
Ityp-LIP2	JADDUH010000005.1:6389163..6395171(+)	NODE_24625	Esterase (lipase-like)	PX172113
